# Supplementary material for: Spatial Learning Promotes Adult Neurogenesis in Specific Regions of the Zebrafish Pallium
Source: Front Cell Dev Biol. 2022 May 11;10:840964. doi: 10.3389/fcell.2022.840964 (PMC9130729; doi:10.3389/fcell.2022.840964)
Supplement: Supplementary file 4 [file DataSheet1.xlsx]

## Sheet: Figure 1B-C
DATA		C1	C2	C3	C4	C5	C6	C7	C8	T1	T2	T3	T4	T5	T6	T7	T8
% of correct choices	S1	54.1667	50	54.1667	54.1667	33.3333	45.8333	58.3333	54.1667	45.8333	58.3333	29.1667	37.5	70.8333	66.6667	62.5	54.1667
	S2	79.1667	41.6667	54.1667	33.3333	58.3333	50	41.6667	58.3333	75	66.6667	45.8333	58.3333	66.6667	66.6667	29.1667	75
	S3	54.1667	79.1667	58.3333	58.3333	50	50	41.6667	62.5	62.5	70.8333	70.8333	62.5	58.3333	62.5	54.1667	58.3333
	S4	62.5	41.6667	50	50	45.8333	54.1667	37.5	45.8333	70.8333	70.8333	75	83.3333	91.6667	79.1667	58.3333	62.5
	S5	62.5	45.8333	45.8333	41.6667	50	45.8333	54.1667	54.1667	75	79.1667	66.6667	70.8333	83.3333	75	87.5	91.6667
	Outliers detected by Grubbs’ test (alpha=0.05):		none
STATISTICS
Two-way RM ANOVA	Two-way RM ANOVA	Matching: Stacked						Bonferroni's multiple comparisons test	Mean Diff.	95.00% CI of diff.	Significant?	Summary	Adjusted P Value
	Assume sphericity?	Yes
	Alpha	0.05						C - T
								S1	-2.6	-16.94 to 11.74	No	ns	>0.9999
	Source of Variation	% of total variation	P value	P value summary	Significant?			S2	-8.338	-22.67 to 5.998	No	ns	0.6404
	Session x Treatment	14.44	0.001	***	Yes			S3	-5.712	-20.05 to 8.623	No	ns	>0.9999
	Session	9.202	0.0143	*	Yes			S4	-25.51	-39.85 to -11.18	Yes	****	<0.0001
	Treatment	25.09	0.0002	***	Yes			S5	-28.65	-42.99 to -14.31	Yes	****	<0.0001
	Subject	13.62	0.1626	ns	No
	ANOVA table	SS	DF	MS	F (DFn, DFd)	P value		Test details	Mean 1	Mean 2	Mean Diff.	SE of diff.	N1	N2	t	DF
	Session x Treatment	2310	4	577.5	F (4, 56) = 5.369	P=0.0010
	Session	1472	4	368.1	F (4, 56) = 3.422	P=0.0143		C - T
	Treatment	4014	1	4014	F (1, 14) = 25.78	P=0.0002		S1	50.53	53.13	-2.6	5.414	8	8	0.4802	70
	Subject	2180	14	155.7	F (14, 56) = 1.447	P=0.1626		S2	52.09	60.43	-8.338	5.414	8	8	1.54	70
	Residual	6023	56	107.6				S3	56.78	62.49	-5.712	5.414	8	8	1.055	70
								S4	48.44	73.95	-25.51	5.414	8	8	4.712	70
	Difference between column means							S5	50	78.65	-28.65	5.414	8	8	5.292	70
	Mean of Trained	65.73
	Mean of Control	51.56
	Difference between means	14.17
	SE of difference	2.79
	95% CI of difference	8.183 to 20.15
Linear regression	Best-fit values	Control	Trained
	Slope	-0.4688	6.458
	Y-intercept	52.97	46.35
	X-intercept	113	-7.177
	1/slope	-2.133	0.1548
	Std. Error
	Slope	1.106	1.271
	Y-intercept	3.67	4.215
	95% Confidence Intervals
	Slope	-2.709 to 1.771	3.886 to 9.031
	Y-intercept	45.54 to 60.40	37.82 to 54.89
	X-intercept	21.99 to +infinity	-13.95 to -4.239
	Goodness of Fit
	R squared	0.004701	0.4047
	Sy.x	9.896	11.37
	Is slope significantly non-zero?
	F	0.1795	25.83
	DFn, DFd	1, 38	1, 38
	P value	0.6742	<0.0001
	Deviation from zero?	Not Significant	Significant

## Sheet: Figure 1E
DATA		C1	C2	C3	C4	C5	C6	T1	T2	T3	T4	T5	T6
#PCNA cells/mm2 (LP)	R	61.825	11.1747	15.0659	30.0158		16.7399	26.0788	14.7897	43.8661	46.985	40.2934	43.4362
	RM	70.4808	57.4228	29.7667	60.8256	53.6509	28.5472	17.6256	28.2472	34.7817	21.4721	44.6317	46.9433
	MC	123.625	96.842	80.022	58.6338	120.984	33.6739	78.3835	284.037	147.592	108.259	72.5041	78.2456
	C		60.2209	42.883	82.0462	81.2722	53.0266	141.107	141.001	103.086	65.8196	118.643	130.207
	Outliers detected by Grubbs’ test (alpha=0.05):								284.037
STATISTICS
NORMALITY TEST
Shapiro-Wilk test	Control-R	Control-RM	Control-MC	Control-C	Trained-R	Trained-RM	Trained-MC	Trained-C
W	0.8077	0.8795	0.9399	0.8957	0.8384	0.9316	0.8197	0.8702
P value	0.0935	0.2669	0.6586	0.3865	0.1264	0.5923	0.1161	0.2272
Passed normality test (alpha=0.05)?	Yes	Yes	Yes	Yes	Yes	Yes	Yes	Yes
P value summary	ns	ns	ns	ns	ns	ns	ns	ns
Number of values	5	6	6	5	6	6	5	6
HOMOSCEDASTICITY TEST
Levene test
Source	DF	Sum of Square	Mean Square	F Statistic	P-value
Groups (between groups)	7	1824.26	260.609	0.955857	0.476942
Error (within groups)	37	10087.8	272.644
Total	44	11912.1	270.73
Two-way ANOVA	Ordinary						Bonferroni's multiple comparisons test	Predicted (LS) mean diff.	95.00% CI of diff.	Significant?	Summary	Adjusted P Value
Alpha	0.05
							Control - Trained
Source of Variation	% of total variation	P value	P value summary	Significant?			R	-8.944	-46.22 to 28.33	No	ns	>0.9999
Interaction	11.27	0.0098	**	Yes			RM	17.83	-17.71 to 53.37	No	ns	0.7831
Pallium Region	52.24	<0.0001	****	Yes			MC	-11.37	-48.64 to 25.91	No	ns	>0.9999
Treatment	3.326	0.0566	ns	No			C	-52.75	-90.03 to -15.48	Yes	**	0.0027
ANOVA table	SS (Type III)	DF	MS	F (DFn, DFd)	P value
Interaction	7214	3	2405	F (3, 37) = 4.375	P=0.0098		Test details	Predicted (LS) mean 1	Predicted (LS) mean 2	Predicted (LS) mean diff.	SE of diff.	N1	N2	t	DF
Pallium Region	33427	3	11142	F (3, 37) = 20.27	P<0.0001
Treatment	2128	1	2128	F (1, 37) = 3.873	P=0.0566		Control - Trained
Residual	20335	37	549.6				R	26.96	35.91	-8.944	14.2	5	6	0.63	37
							RM	50.12	32.28	17.83	13.54	6	6	1.317	37
							MC	85.63	97	-11.37	14.2	6	5	0.8007	37
							C	63.89	116.6	-52.75	14.2	5	6	3.716	37

## Sheet: Figure 1G
DATA		C1	C2	C3	C4	C5	C6	T1	T2	T3	T4	T5	T6
#PCNA cells/mm2 (MP)	R	89.7228	40.0602	22.2902	49.0558		25.4502	77.8456	42.4071	131.351	99.0696	134.143	118.258
	RM	84.211	86.9198	4.29973	22.7892	41.1908	17.9907	55.3027	24.3077	107.847	56.0869	11.8634	64.6162
	MC	107.376	72.4093	0	46.1144	36.193	4.86672	13.425	63.832	74.3444	36.0261	51.889	110.622
	C		20.3848	34.8257	49.5412	16.7874	13.6398	34.845	60.7156	53.8185	52.8387	31.1334	70.7442
	Outliers detected by Grubbs’ test (alpha=0.05):		none
STATISTICS
NORMALITY TEST
Shapiro-Wilk test	Control-R	Control-RM	Control-MC	Control-C	Trained-R	Trained-RM	Trained-MC	Trained-C
W	0.8684	0.8728	0.9454	0.8886	0.9111	0.942	0.9901	0.936
P value	0.2602	0.2374	0.703	0.3501	0.4437	0.675	0.9894	0.6272
Passed normality test (alpha=0.05)?	Yes	Yes	Yes	Yes	Yes	Yes	Yes	Yes
P value summary	ns	ns	ns	ns	ns	ns	ns	ns
Number of values	5	6	6	5	6	6	6	6
HOMOSCEDASTICITY TEST
Levene test
Source	DF	Sum of Square	Mean Square	F Statistic	P-value
Groups (between groups)	7	2308.09	329.727	0.890973	0.523158
Error (within groups)	38	14062.9	370.076
Total	45	16371	363.799
Two-way ANOVA	Ordinary						Bonferroni's multiple comparisons test	Predicted (LS) mean diff.	95.00% CI of diff.	Significant?	Summary	Adjusted P Value
Alpha	0.05
							Control - Trained
Source of Variation	% of total variation	P value	P value summary	Significant?			R	-55.2	-104.8 to -5.623	Yes	*	0.0235
Interaction	6.308	0.324	ns	No			RM	-10.44	-57.70 to 36.83	No	ns	>0.9999
Pallium Region	12.29	0.0895	ns	No			MC	-13.86	-61.13 to 33.40	No	ns	>0.9999
Treatment	13.69	0.0082	**	Yes			C	-23.65	-73.22 to 25.93	No	ns	0.8746
ANOVA table	SS (Type III)	DF	MS	F (DFn, DFd)	P value
Interaction	3500	3	1167	F (3, 38) = 1.197	P=0.3240		Test details	Predicted (LS) mean 1	Predicted (LS) mean 2	Predicted (LS) mean diff.	SE of diff.	N1	N2	t	DF
Pallium Region	6819	3	2273	F (3, 38) = 2.332	P=0.0895
Treatment	7599	1	7599	F (1, 38) = 7.796	P=0.0082		Control - Trained
Residual	37040	38	974.7				R	45.32	100.5	-55.2	18.91	5	6	2.92	38
							RM	42.9	53.34	-10.44	18.03	6	6	0.579	38
							MC	44.49	58.36	-13.86	18.03	6	6	0.7691	38
							C	27.04	50.68	-23.65	18.91	5	6	1.251	38

## Sheet: Figure 2B-C
DATA		C1	C2	C3	C4	C5	C6	C7	C8	T1	T2	T3	T4	T5	T6	T7	T8
% of correct choices	S1	50	54.1667	50	66.6667	58.3333	41.6667	54.1667	66.6667	79.1667	58.3333	54.1667	62.5	45.8333	58.3333	33.3333	54.1667
	S2	41.6667	70.8333	41.6667	58.3333	66.6667	50	41.6667	62.5	75	66.6667	58.3333	70.8333	70.8333	66.6667	50	66.6667
	S3	62.5	75	58.3333	54.1667	50	50	66.6667	66.6667	66.6667	83.3333	66.6667	66.6667	58.3333	66.6667	70.8333	54.1667
	S4	45.8333	50	50	37.5	29.1667	54.1667	70.8333	58.3333	79.1667	66.6667	66.6667	83.3333	70.8333	75	66.6667	58.3333
	S5	62.5	66.6667	58.3333	54.1667	45.8333	62.5	62.5	50	91.6667	75	75	83.3333	70.8333	83.3333	66.6667	66.6667
	S6	50	50	54.1667	70.8333	50	66.6667	58.3333	58.3333	75	50	62.5	58.3333	54.1667	41.6667	70.8333	54.1667
	S7	54.1667	66.6667	66.6667	58.3333	54.1667	41.6667	41.6667	50	83.3333	75	75	83.3333	87.5	45.8333	70.8333	75
	S8	37.5	79.1667	58.3333	45.8333	29.1667	41.6667	45.8333	62.5	79.1667	58.3333	79.1667	75	87.5	75	75	79.1667
	S9	58.3333	33.3333	41.6667	45.8333	62.5	50	50	58.3333	95.8333	83.3333	91.6667	87.5	95.8333	79.1667	87.5	83.3333
	S10	45.8333	62.5	62.5	41.6667	50	45.8333	66.6667	66.6667	95.8333	83.3333	95.8333	100	100	83.3333	83.3333	87.5
	S11	37.5	58.3333	33.3333	41.6667	62.5	50	45.8333	66.6667	54.1667	66.6667	45.8333	50	20.8333	66.6667	45.8333	50
	S12	54.1667	45.8333	62.5	62.5	62.5	54.1667	37.5	50	83.3333	70.8333	87.5	87.5	45.8333	66.6667	45.8333	75
	S13	62.5	66.6667	45.8333	75	41.6667	66.6667	62.5	54.1667	83.3333	79.1667	87.5	87.5	45.8333	79.1667	66.6667	95.8333
	S14	50	62.5	54.1667	66.6667	54.1667	41.6667	54.1667	50	95.8333	91.6667	91.6667	95.8333	66.6667	83.3333	70.8333	95.8333
	S15	41.6667	62.5	50	41.6667	54.1667	66.6667	70.8333	54.1667	87.5	100	100	87.5	87.5	95.8333	79.1667	83.3333
	Outliers detected by Grubbs’ test (alpha=0.05):		none
STATISTICS
Two-way RM ANOVA	Two-way RM ANOVA	Matching: Stacked						Bonferroni's multiple comparisons test	Mean Diff.	95.00% CI of diff.	Significant?	Summary	Adjusted P Value
	Assume sphericity?	Yes
	Alpha	0.05						Control - Trained
								S1	-0.5167	-16.52 to 15.49	No	ns	>0.9999
	Source of Variation	% of total variation	P value	P value summary	Significant?			S2	-11.46	-27.46 to 4.548	No	ns	0.5207
	Session x Treatment	14.57	<0.0001	****	Yes			S3	-6.258	-22.26 to 9.748	No	ns	>0.9999
	Session	14.98	<0.0001	****	Yes			S4	-21.36	-37.36 to -5.352	Yes	**	0.0015
	Treatment	32.85	<0.0001	****	Yes			S5	-18.75	-34.76 to -2.743	Yes	**	0.0092
	Subject	6.788	0.0002	***	Yes			S6	-1.042	-17.05 to 14.96	No	ns	>0.9999
								S7	-20.31	-36.32 to -4.306	Yes	**	0.0032
	ANOVA table	SS	DF	MS	F (DFn, DFd)	P value		S8	-26.04	-42.05 to -10.04	Yes	****	<0.0001
	Session x Treatment	9460	14	675.7	F (14, 196) = 6.621	P<0.0001		S9	-38.02	-54.03 to -22.01	Yes	****	<0.0001
	Session	9723	14	694.5	F (14, 196) = 6.805	P<0.0001		S10	-35.94	-51.94 to -19.93	Yes	****	<0.0001
	Treatment	21330	1	21330	F (1, 14) = 67.71	P<0.0001		S11	-0.5208	-16.53 to 15.49	No	ns	>0.9999
	Subject	4410	14	315	F (14, 196) = 3.087	P=0.0002		S12	-16.67	-32.67 to -0.6601	Yes	*	0.0339
	Residual	20002	196	102.1				S13	-18.75	-34.76 to -2.743	Yes	**	0.0092
								S14	-32.29	-48.30 to -16.29	Yes	****	<0.0001
	Difference between column means							S15	-34.9	-50.90 to -18.89	Yes	****	<0.0001
	Mean of Control	54.38
	Mean of Trained	73.23
	Difference between means	-18.85						Test details	Mean 1	Mean 2	Mean Diff.	SE of diff.	N1	N2	t	DF
	SE of difference	2.291
	95% CI of difference	-23.77 to -13.94						Control - Trained
								S1	55.21	55.73	-0.5167	5.391	8	8	0.09584	210
								S2	54.17	65.63	-11.46	5.391	8	8	2.125	210
								S3	60.42	66.68	-6.258	5.391	8	8	1.161	210
Linear regression	Best-fit values	1st week	2nd week	3rd week				S4	49.48	70.84	-21.36	5.391	8	8	3.962	210
	Slope	4.688	7.917	9.635				S5	57.81	76.56	-18.75	5.391	8	8	3.478	210
	Y-intercept	53.02	53.85	46.09				S6	57.29	58.33	-1.042	5.391	8	8	0.1932	210
	X-intercept	-11.31	-6.803	-4.784				S7	54.17	74.48	-20.31	5.391	8	8	3.768	210
	1/slope	0.2133	0.1263	0.1038				S8	50	76.04	-26.04	5.391	8	8	4.831	210
								S9	50	88.02	-38.02	5.391	8	8	7.053	210
	Std. Error							S10	55.21	91.15	-35.94	5.391	8	8	6.666	210
	Slope	1.043	1.076	1.542				S11	49.48	50	-0.5208	5.391	8	8	0.09661	210
	Y-intercept	3.458	3.567	5.113				S12	53.65	70.31	-16.67	5.391	8	8	3.092	210
								S13	59.38	78.13	-18.75	5.391	8	8	3.478	210
	95% Confidence Intervals							S14	54.17	86.46	-32.29	5.391	8	8	5.99	210
	Slope	2.577 to 6.798	5.739 to 10.09	6.514 to 12.76				S15	55.21	90.1	-34.9	5.391	8	8	6.473	210
	Y-intercept	46.02 to 60.02	46.63 to 61.08	35.74 to 56.44
	X-intercept	-23.06 to -6.836	-10.55 to -4.660	-8.554 to -2.838
	Goodness of Fit
	R squared	0.3472	0.5877	0.5069
	Sy.x	9.326	9.62	13.79
	Is slope significantly non-zero?
	F	20.21	54.17	39.06
	DFn, DFd	1, 38	1, 38	1, 38
	P value	<0.0001	<0.0001	<0.0001
	Deviation from zero?	Significant	Significant	Significant

## Sheet: Figure 2D
DATA		C1	C2	C3	C4	C5	C6	T1	T2	T3	T4	T5	T6	T7
#BrdU/NeuN cells/mm2 (LP)	R	0	98.574	58.727		20.514	31.994	84.75	13.992	42.369	44.199	53.05	15.549	21.363
	RM	38.54	74.003	32.487	32.684	17.464	9.1032	92.322	57.131	19.8	30.996	55.163	25.482	5.7465
	MC	61.129	89.655	25.755	49.716	43.753	87.802	300.46	73.81	64.093	22.617	49.814	17.647	44.595
	C	34.277	225.94	60.631	72.551	54.5	0	151.76	80.255	57.245	117.37	181.42	82.61	115.32
	Outliers detected by Grubbs’ test (alpha=0.05):		225.94					300.46
STATISTICS
NORMALITY TEST
Shapiro-Wilk test	Control-R	Control-RM	Control-MC	Control-C	Trained-R	Trained-RM	Trained-MC	Trained-C
W	0.9621	0.9021	0.9281	0.9218	0.9026	0.9405	0.9427	0.9554
P value	0.8223	0.3867	0.5659	0.5417	0.3469	0.6434	0.6809	0.7788
Passed normality test (alpha=0.05)?	Yes	Yes	Yes	Yes	Yes	Yes	Yes	Yes
P value summary	ns	ns	ns	ns	ns	ns	ns	ns
Number of values	5	6	6	5	7	7	6	7
HOMOSCEDASTICITY TEST
Levene test
Source	DF	Sum of Square	Mean Square	F Statistic	P-value
Groups (between groups)	7	1588.8	226.972	0.622372	0.73436
Error (within groups)	41	14952.2	364.688
Total	48	16541	344.605
Two-way ANOVA	Ordinary						Bonferroni's multiple comparisons test	Predicted (LS) mean diff.	95.00% CI of diff.	Significant?	Summary	Adjusted P Value
Alpha	0.05
							Control - Trained
Source of Variation	% of total variation	P value	P value summary	Significant?			R	2.637	-43.61 to 48.88	No	ns	>0.9999
Interaction	17.36	0.0098	**	Yes			RM	-6.902	-50.84 to 37.04	No	ns	>0.9999
Pallium Region	18.08	0.0081	**	Yes			MC	14.21	-31.40 to 59.81	No	ns	>0.9999
Treatment	3.71	0.1039	ns	No			C	-67.89	-114.1 to -21.64	Yes	**	0.0017
ANOVA table	SS (Type III)	DF	MS	F (DFn, DFd)	P value
Interaction	11827	3	3942	F (3, 41) = 4.314	P=0.0098		Test details	Predicted (LS) mean 1	Predicted (LS) mean 2	Predicted (LS) mean diff.	SE of diff.	N1	N2	t	DF
Pallium Region	12318	3	4106	F (3, 41) = 4.493	P=0.0081
Treatment	2528	1	2528	F (1, 41) = 2.766	P=0.1039		Control - Trained
Residual	37469	41	913.9				R	41.96	39.32	2.637	17.7	5	7	0.149	41
							RM	34.05	40.95	-6.902	16.82	6	7	0.4104	41
							MC	59.64	45.43	14.21	17.45	6	6	0.8139	41
							C	44.39	112.3	-67.89	17.7	5	7	3.835	41

## Sheet: Figure 2E-Top
DATA	Control	Trained
%BrdU/NeuN cells (cLP)	1	0.857143
	1	1
	0.75	0.888889
	0.631579	1
	0.8	0.9
		0.823529
		0.666667
STATISTICS	Shapiro-Wilk Normality Test:		Passed (p=0.3168)
Unpaired t test	Unpaired t test
	P value	0.6218
	P value summary	ns
	Significantly different (P < 0.05)?	No
	One- or two-tailed P value?	Two-tailed
	t, df	t=0.5091, df=10
	How big is the difference?
	Mean of column A	0.8363
	Mean of column B	0.8766
	Difference between means (B - A) ± SEM	0.04029 ± 0.07914
	95% confidence interval	-0.1361 to 0.2166
	R squared (eta squared)	0.02526
	F test to compare variances
	F, DFn, Dfd	1.994, 4, 6
	P value	0.429
	P value summary	ns
	Significantly different (P < 0.05)?	No

## Sheet: Figure 2E-Bottom
DATA	Control	Trained		STATISTICS	Shapiro-Wilk Normality Test:	Failed (p<0.0001)
Migration distance (μm) (cLP)	0.0137905	6.59475		Mann Whitney test	Mann Whitney test
	0.0193545	0			P value	0.4256
	0	8.16825			Exact or approximate P value?	Exact
	0	10.8682			P value summary	ns
	5.6905	6.1195			Significantly different (P < 0.05)?	No
	0	11.7088			One- or two-tailed P value?	Two-tailed
	7.8185	0			Sum of ranks in column A,B	3850 , 7778
	5.2815	0			Mann-Whitney U	2419
	10.8503	11.496
	7.38725	9.8215			Difference between medians
	0	0			Median of column A	5.335, n=53
	5.38975	0.2275			Median of column B	5.745, n=99
	5.7125	5.74525			Difference: Actual	0.4103
	0	0			Difference: Hodges-Lehmann	0.005
	4.98225	0
	6.60875	9.24525
	0	0
	6.033	10.543
	7.41525	6.678
	7.1535	8.97875
	10.5277	0
	8.184	6.3295
	0	6.9245
	0	6.329
	0	8.11925
	0.09125	7.565
	9.93625	7.5065
	0	6.85775
	6.61875	4.7895
	15.683	0
	4.52575	4.51625
	6.652	6.234
	5.629	7.33075
	10.9965	14.1935
	1.802	8.5785
	0	12.9763
	6.488	10.0337
	3.772	10.6835
	7.21725	5.0905
	5.204	4.116
	6.46775	4.922
	0	6.6875
	15.1197	7.733
	7.734	0
	6.041	6.78075
	4.98	11.9488
	0	12.4767
	0	8.99375
	9.58325	13.9455
	7.73275	7.98275
	4.49975	7.553
	2.403	8.59825
	5.335	16.3663
		0
		6.5885
		0
		0
		0
		5.83
		9.146
		3.13225
		4.77625
		6.038
		5.5
		0
		0
		0
		4.60725
		6.441
		6.26325
		16.4632
		12.4612
		0
		19.3388
		11.191
		18.3715
		0
		4.93525
		4.026
		0
		0
		0
		3.28475
		5.09375
		0
		0
		3.03
		0
		0
		0
		0
		4.27075
		0
		4.0215
		5.3965
		14.9998
		4.0215
		5.3965
		14.9998

## Sheet: Figure 2G
DATA		C1	C2	C3	C4	C5	C6	T1	T2	T3	T4	T5	T6	T7
#BrdU/NeuN cells/mm2 (MP)	R	58.0821	104.548	0		126.02	0	435.01	282.56	281.76	66.106	260.09	47.049	58.97
	RM	31.3828	30.234	87.063	0	187.27	76.719	262.484	318.65	132.87	98.334	149.27	108.94	41.565
	MC	129.798	136.99	35.363	72.155	47.329	118.84	138.595	266.71	58.263	184.7	60.331	119.81	15.467
	C	19.1655	72.049	105.7	33.441	121.63	35.487	10.974	115.11	123.52	141.7	103.9	101.74	33.176
	Outliers detected by Grubbs’ test (alpha=0.05):		none
STATISTICS
NORMALITY TEST
Shapiro-Wilk test	Control-R	Control-RM	Control-MC	Control-C	Trained-R	Trained-RM	Trained-MC	Trained-C
W	0.8786	0.8934	0.8799	0.8999	0.8661	0.9135	0.9559	0.8613
P value	0.3029	0.3365	0.2685	0.3734	0.1717	0.4204	0.7833	0.1556
Passed normality test (alpha=0.05)?	Yes	Yes	Yes	Yes	Yes	Yes	Yes	Yes
P value summary	ns	ns	ns	ns	ns	ns	ns	ns
Number of values	5	6	6	6	7	7	7	7
HOMOSCEDASTICITY TEST
Levene test
Source	DF	Sum of Square	Mean Square	F Statistic	P-value
Groups (between groups)	7	37404.6	5343.52	1.85753	0.100702
Error (within groups)	43	123697	2876.69
Total	50	161102	3222.04
Two-way ANOVA	Ordinary						Bonferroni's multiple comparisons test	Predicted (LS) mean diff.	95.00% CI of diff.	Significant?	Summary	Adjusted P Value
Alpha	0.05
							Control - Trained
Source of Variation	% of total variation	P value	P value summary	Significant?			R	-146.8	-275.0 to -18.60	Yes	*	0.0186
Interaction	7.051	0.2513	ns	No			RM	-90.1	-211.9 to 31.69	No	ns	0.2416
Pallium Region	4.428	0.4545	ns	No			MC	-30.47	-152.3 to 91.31	No	ns	>0.9999
Treatment	15.88	0.0035	**	Yes			C	-25.44	-147.2 to 96.35	No	ns	>0.9999
ANOVA table	SS (Type III)	DF	MS	F (DFn, DFd)	P value
Interaction	29937	3	9979	F (3, 43) = 1.415	P=0.2513		Test details	Predicted (LS) mean 1	Predicted (LS) mean 2	Predicted (LS) mean diff.	SE of diff.	N1	N2	t	DF
Pallium Region	18800	3	6267	F (3, 43) = 0.8889	P=0.4545
Treatment	67422	1	67422	F (1, 43) = 9.564	P=0.0035		Control - Trained
Residual	303148	43	7050				R	57.73	204.5	-146.8	49.16	5	7	2.985	43
							RM	68.78	158.9	-90.1	46.71	6	7	1.929	43
							MC	90.08	120.6	-30.47	46.71	6	7	0.6524	43
							C	64.58	90.02	-25.44	46.71	6	7	0.5446	43

## Sheet: Figure 2H-Top
DATA	Control	Trained
%BrdU/NeuN cells (rMP)	1	0.941176
	0.9	0.857143
	0.9	1
	0	0.8
		0.833333
		1
		1
STATISTICS	Shapiro-Wilk Normality Test:		Failed (p=0.0145)
Mann Whitney test	Mann Whitney test
	P value	0.6697
	Exact or approximate P value?	Exact
	P value summary	ns
	Significantly different (P < 0.05)?	No
	One- or two-tailed P value?	Two-tailed
	Sum of ranks in column A,B	21.50 , 44.50
	Mann-Whitney U	11.5
	Difference between medians
	Median of column A	0.9000, n=4
	Median of column B	0.9412, n=7
	Difference: Actual	0.04118
	Difference: Hodges-Lehmann	0.04118

## Sheet: Figure 2H-Bottom
DATA	Control	Trained		STATISTICS	Shapiro-Wilk Normality Test:	Failed (p<0.0001)
Migration distance (μm) (rMP)	0	3.78275		Mann Whitney test	Mann Whitney test
	16.851	5.65			P value	0.0118
	14.7982	6.741			Exact or approximate P value?	Exact
	0	0			P value summary	*
	10.3082	0			Significantly different (P < 0.05)?	Yes
	10.5452	3.564			One- or two-tailed P value?	Two-tailed
	10.1595	0			Sum of ranks in column A,B	1491 , 3762
	13.1805	12.4947			Mann-Whitney U	602
	0	0
	0	0			Difference between medians
	28.6575	6.00975			Median of column A	10.55, n=23
	8.8745	25.889			Median of column B	5.361, n=79
	13.1062	15.7792			Difference: Actual	-5.184
	5.404	10.431			Difference: Hodges-Lehmann	-5.539
	0	29.0205
	0	0
	29.743	0
	28.1318	6.9695
	30.7677	0
	32.5793	0
	30.3747	0
	22.9683	3.87175
	7.43775	0
		0
		0
		12.5
		11.5732
		7.8625
		26.9217
		0
		5.425
		11.6583
		1.06925
		0
		7.1
		0
		3.8985
		4.0115
		6.4935
		8.3215
		0
		4.1975
		8.91325
		3.564
		0
		0
		35.0887
		33.242
		15.0995
		3.20075
		3.33525
		7.1835
		5.55725
		0
		0
		0
		6.80025
		0
		10.5518
		11.0013
		30.3148
		24.2643
		14.4317
		7.48075
		0
		0
		0
		0
		0
		5.361
		8.54225
		10.428
		13.8383
		5.13825
		6.80075
		10.624
		8.13675
		11.035
		8.1435

[truncated: 22 more sheets: Figure 3B-C, Figure 3D, Figure 3E-Top, Figure 3E-Bottom, Figure 3G, Figure 3H-Top, Figure 3H-Bottom, Figure 4B-C, Figure 4D-Left, Figure 4D-Right, Figure 5B, Figure 5C-Top, Figure 5C-Bottom, Figure 5E, Figure 5F-top, Figure 5F-bottom, Figure 6E, Figure 6F, Supp Fig 2B, Supp Fig 2C-Left …]
